# Supplementary material
Source: PubMed Central journal article supplement (PMC3683797)
Supplement: 1307928110_pnas.201307928SI.pdf [file 1307928110_pnas.201307928SI.pdf]

# Supporting Information

Um et al. 10.1073/pnas.1307928110

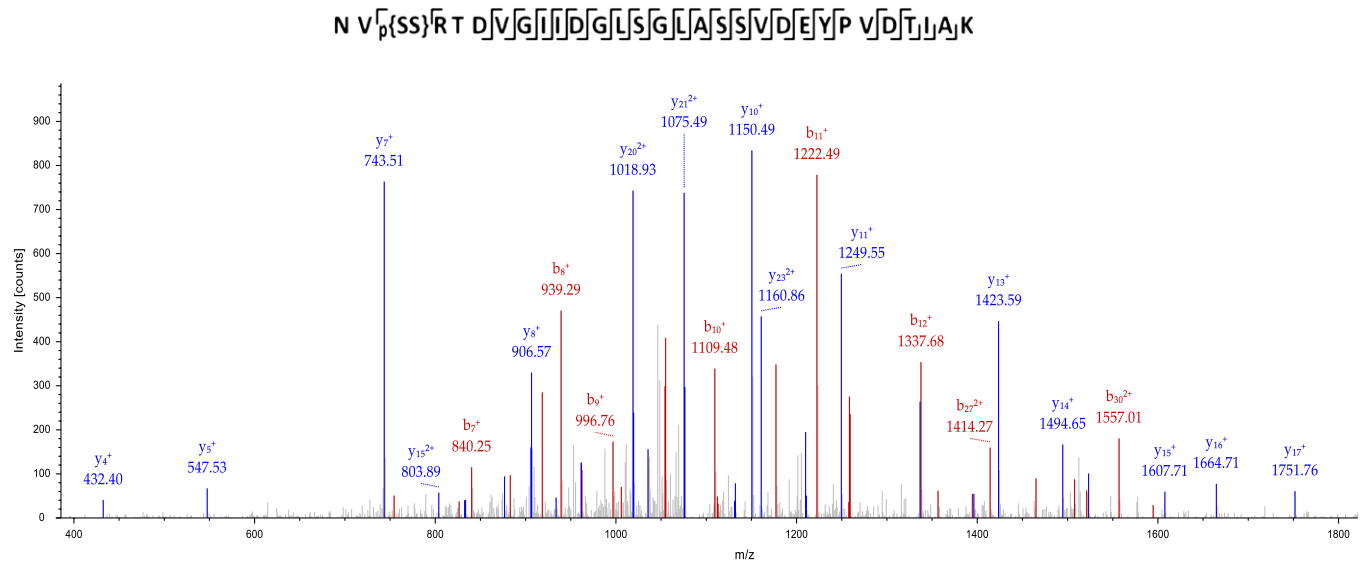

**Fig. S1.** Identification of the AMP-activated protein kinase (AMPK) phosphorylation site in recombination-activating gene 1 protein (RAG1). Collision-induced dissociation (CID) spectrum confirmed that a RAG1 peptide containing S528 was singly phosphorylated. The fragment ion masses localized the phosphorylation site to either S527 or S528. The peptide fragments N-terminal to the fragmentation sites (b) are shown in blue and the peptide fragments C-terminal to the fragmentation sites (y) are shown in red.

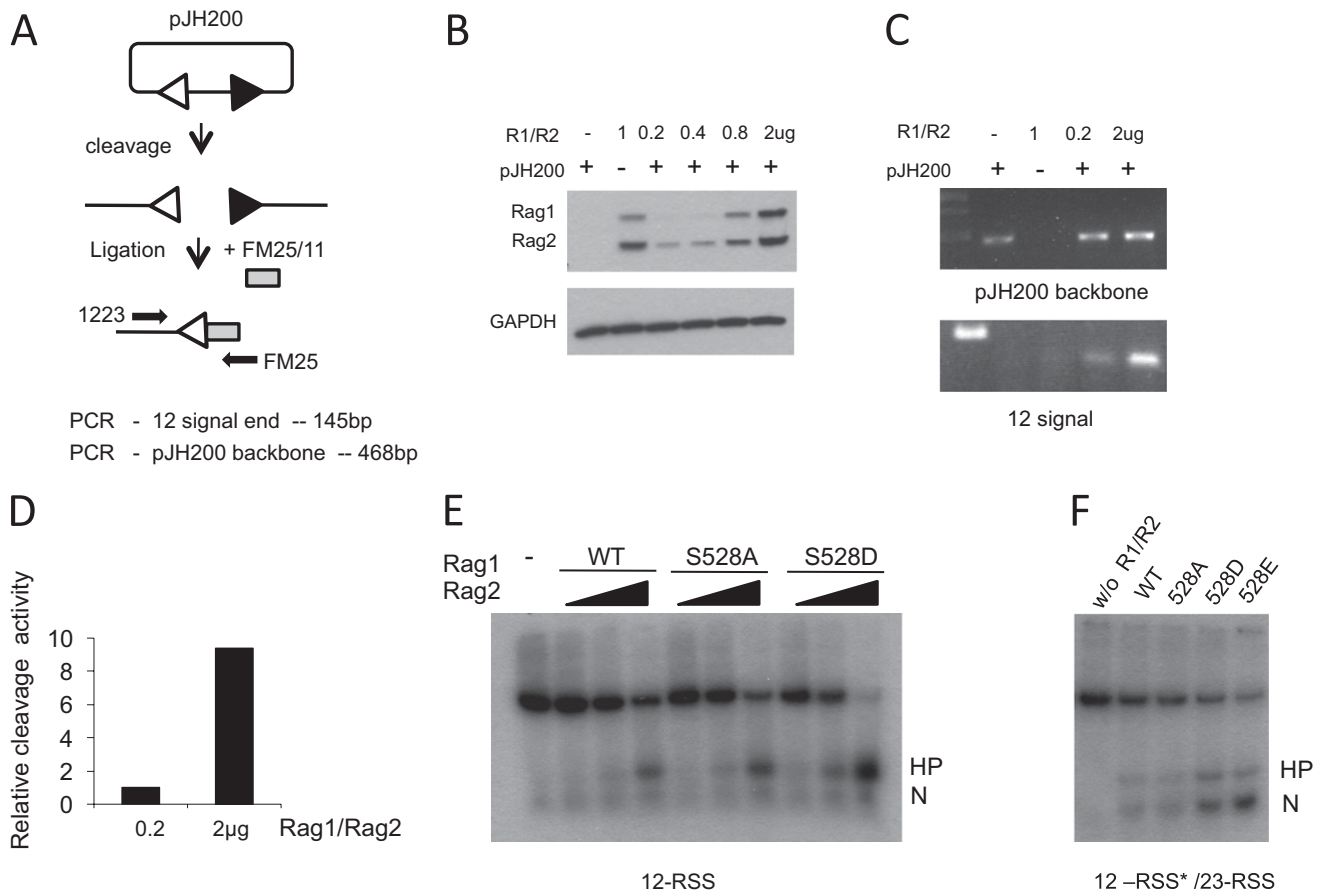

**Fig. 52.** Extrachromosomal cleavage of pJH200 (1) recombination substrate was detected by ligation-mediated PCR (LM-PCR), using different expression levels of WT RAG1/RAG2 to establish an approximately linear range. (A) Diagram of the extrachromosomal cleavage assay is shown. (B) 293T cells were transfected with different amounts of RAG1/RAG2(R1/R2) while maintaining a constant amount of transfected pJH200. RAG1/RAG2 expression was evaluated by Western blot. GAPDH was used as a loading control. (C) DNA cleavage in 293T cells transfected with 0.2 or 2 µg of RAG1/RAG2 was compared. Cleavage was detected by LM-PCR of 12-recombination signal sequence (RSS). (D) The cleavage detected in C was quantified. (E) Various amounts of WT and S528 mutants of RAG1 were incubated with RAG2 and with radiolabeled 12-RSS oligonucleotide and  $MnCl_2$  in an in vitro cleavage reaction. The nick (N) and hairpin (HP) cleavage products were analyzed by TBE-urea gel. (F) HP and N formation from a coupled cleavage reaction contained HMGB1,  $MgCl_2$ , RAG1 (WT and mutants), and WT RAG2, with radiolabeled 12-RSS and unlabeled 23-RSS.

1. Hesse JE, Lieber MR, Gellert M, Mizuuchi K (1987) Extrachromosomal DNA substrates in pre-B cells undergo inversion or deletion at immunoglobulin V-(D)-J joining signals. *Cell* 49(6): 775-783.
